# Supplementary material
Source: PubMed Central journal article supplement (PMC4068506)

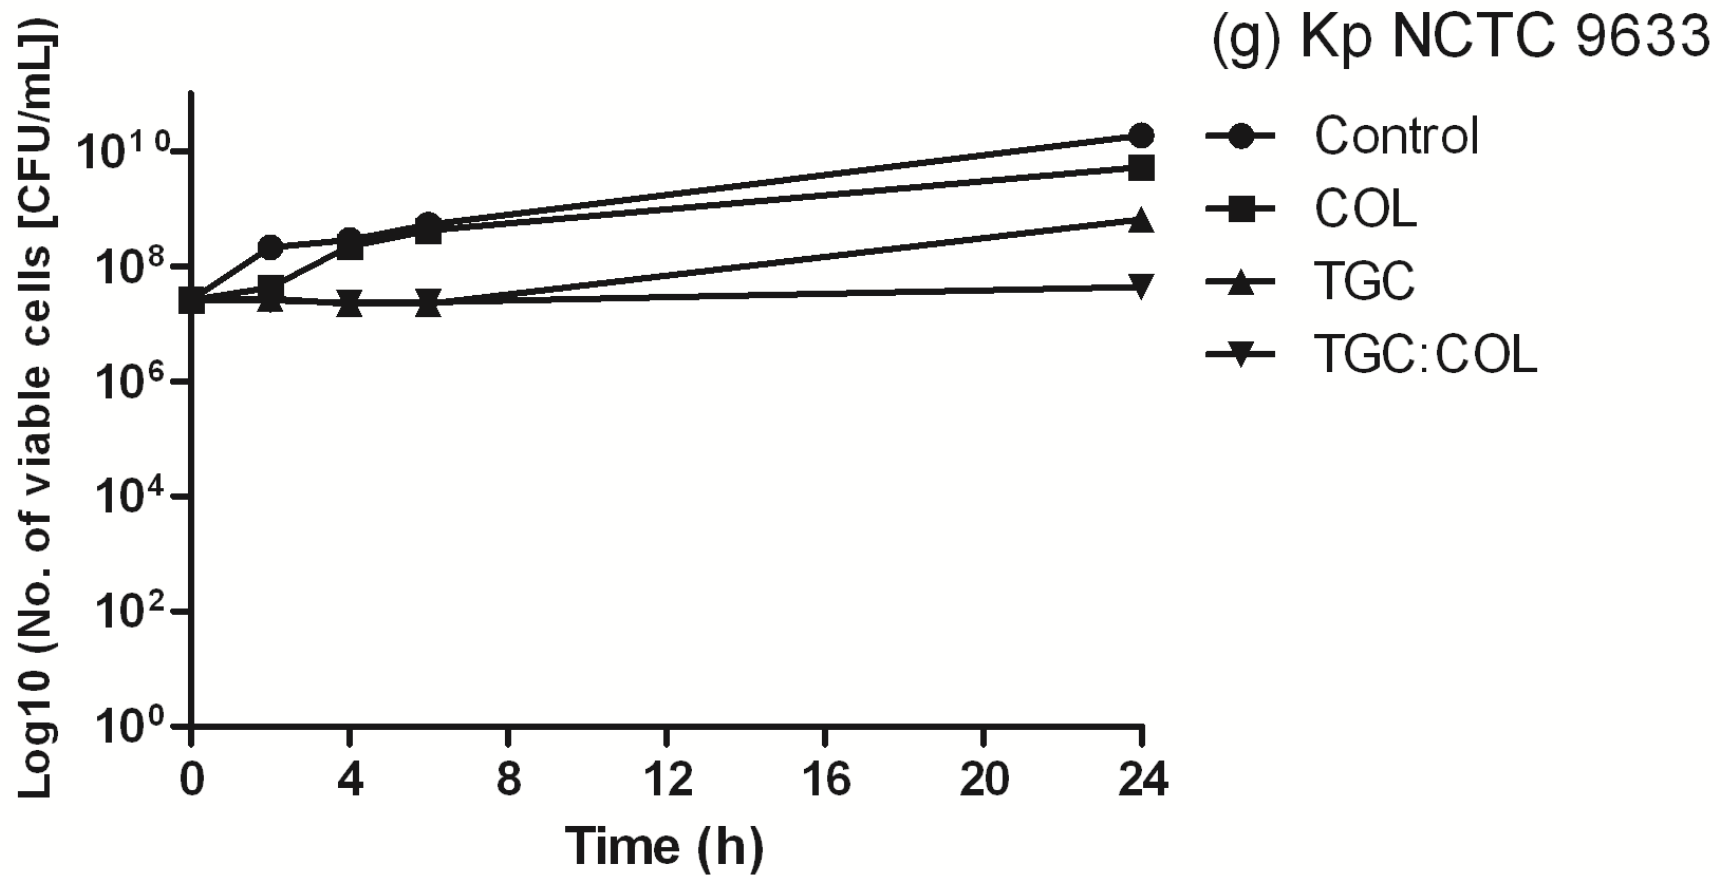

FIG S1. Time-kill graph for *K. pneumoniae* NCTC 9633 exposed to TGC and COL alone and in combination

Supplement: AAC.02449-14_zac006142909so1.pdf [file AAC.02449-14_zac006142909so1.pdf]
